# Supplementary material for: Synthesis, characterization and biological evaluation of dipicolylamine sulfonamide derivatized platinum complexes as potential anticancer agents
Source: PubMed Central journal article supplement (PMC9033217; doi:10.1039/d1ra00842k), 2021-05-14
Supplement: RA-011-D1RA00842K-s001.pdf [file RA-011-D1RA00842K-s001.pdf]

# Synthesis, Characterization and Biological Evaluation of Dipicolylamine Sulfonamide Derivatized Platinum Complexes as Potential Anticancer Agents

## Supporting Information

Nadini Thushara<sup>1</sup>, Taniya Darshani<sup>1</sup>, Sameera R Samarakoon<sup>4</sup>, Inoka C Perera<sup>2</sup>, Frank R. Fronczek,<sup>3</sup> W M C Sameera<sup>5</sup> and Theshini Perera\*<sup>1</sup>

<sup>1</sup> Department of Chemistry, University of Sri Jayewardenepura, Sri Lanka \*theshi@sjp.ac.lk

<sup>2</sup> Department of Zoology and Environmental Science, University of Colombo, Sri Lanka

<sup>3</sup> Department of Chemistry, Louisiana State University, Baton Rouge, LA, USA

<sup>4</sup> Institute of Biochemistry, Molecular Biology and Biotechnology, University of Colombo, Sri Lanka

<sup>5</sup> Institute of Low Temperature Science, Hokkaido University, N19-W8, Kita ku, Sapporo, Hokkaido 060-0819, Japan.

| Section                                                                                                                                                                                                | PAGE |
|--------------------------------------------------------------------------------------------------------------------------------------------------------------------------------------------------------|------|
| 1. Selected bond distances for N(SO <sub>2</sub> (2-nap))dpa                                                                                                                                           | 2    |
| 2. Selected bond angles for N(SO <sub>2</sub> (2-nap))dpa                                                                                                                                              | 2    |
| 3. Experimental excitation (Ex) and emission (Em) wavelengths of compounds                                                                                                                             | 2    |
| 4. Emission spectra of Pt complexes in methanol excited at 275 nm                                                                                                                                      | 3    |
| 5. Kohn-Sham frontier molecular orbitals of the optimized ground state structures of [PtCl <sub>2</sub> (N(SO <sub>2</sub> (1-nap))dpa)] and [PtCl <sub>2</sub> (N(SO <sub>2</sub> pip)dpa)] complexes | 4    |
| 6. TDDFT results for N(SO <sub>2</sub> (2-nap))dpa and [PtCl <sub>2</sub> (N(SO <sub>2</sub> (2-nap))dpa)] systems                                                                                     | 5    |
| 7. IC <sub>50</sub> graphs of compounds                                                                                                                                                                | 25   |
| 8. IC <sub>50</sub> graphs of compounds against MCF-10A human normal breast cells                                                                                                                      | 26   |
| 9. Cartesian coordinates of the optimized structures                                                                                                                                                   | 26   |

1. Selected bond distances for N(SO<sub>2</sub>(2-nap))dpa

**Table S1.** Selected bond distances for N(SO<sub>2</sub>(2-nap))dpa

|        | Bond length (Å) |            |         | Bond length (Å) |            |
|--------|-----------------|------------|---------|-----------------|------------|
|        | Actual          | Calculated |         | Actual          | Calculated |
| S1-O1  | 1.4350 (6)      | 1.4324     | S1-C13  | 1.7692 (6)      | 1.7688     |
| S1-O2  | 1.4352 (6)      | 1.4333     | C13-C22 | 1.4191 (9)      | 1.4140     |
| S1-N2  | 1.6277 (6)      | 1.6314     | N2-C7   | 1.4712 (9)      | 1.4584     |
| S1-C13 | 1.7692 (6)      | 1.7653     | N2-C6   | 1.4752 (9)      | 1.4613     |
| N1-C5  | 1.3359 (10)     | 1.3306     | N3-C8   | 1.3401 (10)     | 1.3313     |
| N1-C1  | 1.3462 (11)     | 1.3317     | N3-C12  | 1.3412 (11)     | 1.3303     |

2. Selected bond angles for N(SO<sub>2</sub>(2-nap))dpa

**Table S2.** Selected bond angles for N(SO<sub>2</sub>(2-nap))dpa

|           | Bond angle (deg) |            |           | Bond angle (deg) |            |
|-----------|------------------|------------|-----------|------------------|------------|
|           | Actual           | Calculated |           | Actual           | Calculated |
| O2-S1-O1  | 119.64 (4)       | 119.83     | C5-N1-C1  | 117.09 (7)       | 117.98     |
| O2-S1-N2  | 106.94 (3)       | 107.10     | C7-N2-C6  | 117.13 (6)       | 116.42     |
| O1-S1-N2  | 106.83 (3)       | 106.95     | C7-N2-S1  | 115.64 (5)       | 117.96     |
| O2-S1-C13 | 107.29 (3)       | 108.11     | C6-N2-S1  | 119.61 (5)       | 119.67     |
| O1-S1-C13 | 107.43 (3)       | 107.99     | C8-N3-C12 | 117.61 (7)       | 118.16     |
| N2-S1-C13 | 108.30 (3)       | 106.05     | N1-C1-C2  | 123.93 (8)       | 123.38     |

3. Experimental emission (Em) wavelengths of compounds

**Table S3.** Experimental emission (Em) wavelengths of N(SO<sub>2</sub>(2-nap))dpa, [PtCl<sub>2</sub>(N(SO<sub>2</sub>(2-nap))dpa)], N(SO<sub>2</sub>(1-nap))dpa, [PtCl<sub>2</sub>(N(SO<sub>2</sub>(1-nap))dpa)] and [PtCl<sub>2</sub>(NSO<sub>2</sub>pipdpa)] in methanol.

| Test sample                                         | Em (nm) |
|-----------------------------------------------------|---------|
| N(SO <sub>2</sub> (2-nap))dpa                       | 343     |
| [PtCl <sub>2</sub> (N(SO <sub>2</sub> (2-nap))dpa)] | 612     |
| N(SO <sub>2</sub> (1-nap))dpa                       | 342     |
| [PtCl <sub>2</sub> (N(SO <sub>2</sub> (1-nap))dpa)] | 615     |
| [PtCl <sub>2</sub> (N(SO <sub>2</sub> pip)dpa)]     | 611     |

4. Emission spectra of Pt complexes in methanol excited at 275 nm

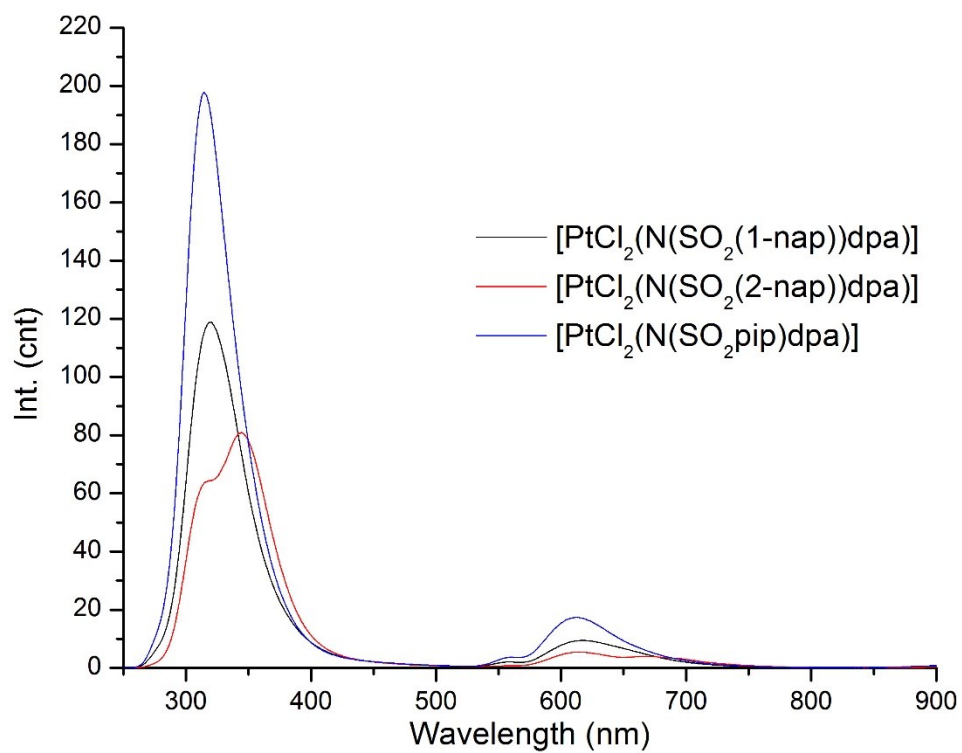

Figure S1: Emission spectra of Pt complexes in methanol excited at 275nm

5. Kohn-Sham frontier molecular orbitals of the optimized ground state structures of  $[\text{PtCl}_2(\text{N}(\text{SO}_2(1\text{-nap})\text{dpa}))]$  and  $[\text{PtCl}_2(\text{N}(\text{SO}_2\text{pip})\text{dpa})]$  complexes

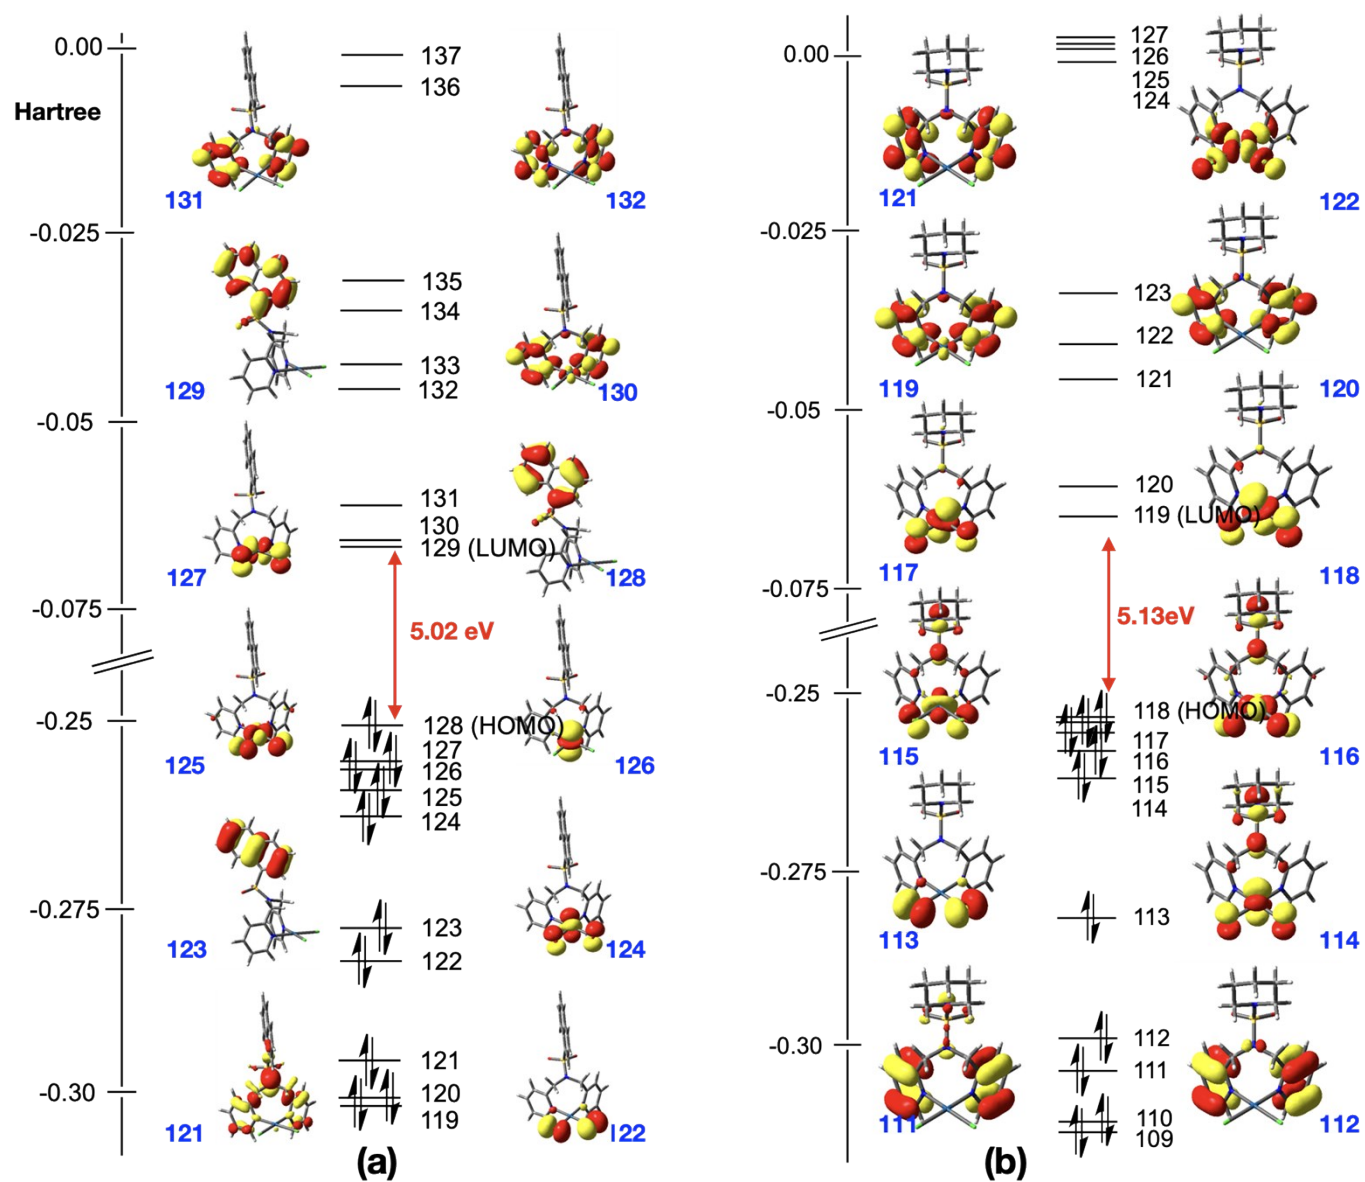

**Figure S2.** Kohn-Sham frontier molecular orbitals of the optimized structures of (a)  $[\text{PtCl}_2(\text{N}(\text{SO}_2(1\text{-nap})\text{dpa}))]$  and (b)  $[\text{PtCl}_2(\text{N}(\text{SO}_2\text{pip})\text{dpa})]$ .

## 6. TDDFT results for N(SO<sub>2</sub>(2-nap))dpa and [PtCl<sub>2</sub>(N(SO<sub>2</sub>(2-nap))dpa)] systems

### N(SO<sub>2</sub>(2-nap))dpa system

Excited State 1: Singlet-?Sym 4.2868 eV 289.23 nm f=0.0651 <S\*\*2>=0.000

|           |          |
|-----------|----------|
| 101 ->103 | 0.16166  |
| 102 ->103 | 0.63276  |
| 102 ->104 | -0.13264 |
| 102 ->105 | 0.11826  |

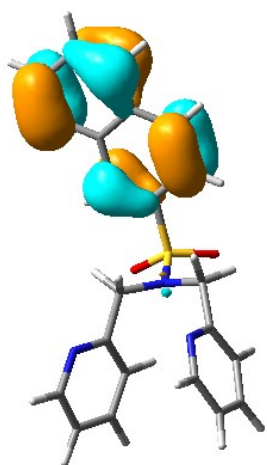

HOMO

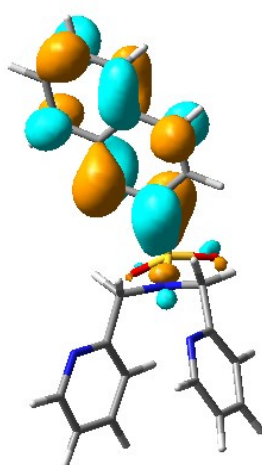

LUMO

This state for optimization and/or second-order correction.

Total Energy, E(TD-HF/TD-DFT) = -1561.53864624

Copying the excited state density for this state as the 1-particle RhoCl density.

Excited state symmetry could not be determined.

Excited State 2: Singlet-?Sym 4.4607 eV 277.95 nm f=0.0170 <S\*\*2>=0.000

|           |          |
|-----------|----------|
| 97 ->103  | -0.10183 |
| 99 ->103  | 0.13310  |
| 100 ->103 | 0.16912  |
| 101 ->103 | 0.37935  |
| 102 ->103 | -0.26780 |
| 102 ->104 | -0.37215 |
| 102 ->105 | 0.25788  |

Excited state symmetry could not be determined.

Excited State 3: Singlet-?Sym 4.9643 eV 249.75 nm f=0.1671 <S\*\*2>=0.000

|           |          |
|-----------|----------|
| 98 ->103  | -0.16725 |
| 98 ->104  | 0.22833  |
| 98 ->105  | 0.26700  |
| 98 ->106  | 0.13534  |
| 98 ->107  | -0.18253 |
| 99 ->103  | 0.11099  |
| 99 ->104  | -0.14775 |
| 99 ->105  | -0.11032 |
| 99 ->106  | 0.12858  |
| 101 ->103 | -0.24534 |
| 101 ->104 | 0.18181  |
| 101 ->105 | 0.14153  |
| 102 ->104 | -0.25931 |

Excited state symmetry could not be determined.

Excited State 4: Singlet-?Sym 5.0036 eV 247.79 nm f=0.0083 <S\*\*2>=0.000

|           |          |
|-----------|----------|
| 98 ->103  | 0.11255  |
| 98 ->104  | -0.24101 |
| 98 ->105  | -0.27832 |
| 99 ->104  | -0.26691 |
| 99 ->105  | -0.20012 |
| 99 ->106  | 0.28264  |
| 99 ->107  | -0.21859 |
| 101 ->104 | 0.11553  |
| 101 ->106 | -0.15157 |
| 101 ->107 | 0.11551  |

Excited state symmetry could not be determined.

Excited State 5: Singlet-?Sym 5.0776 eV 244.18 nm f=0.2415 <S\*\*2>=0.000

|          |          |
|----------|----------|
| 96 ->103 | 0.10542  |
| 99 ->104 | -0.12325 |

|           |          |
|-----------|----------|
| 99 ->105  | -0.10136 |
| 99 ->106  | 0.11893  |
| 100 ->103 | -0.38470 |
| 100 ->104 | 0.10280  |
| 101 ->103 | 0.43933  |
| 102 ->104 | 0.13514  |

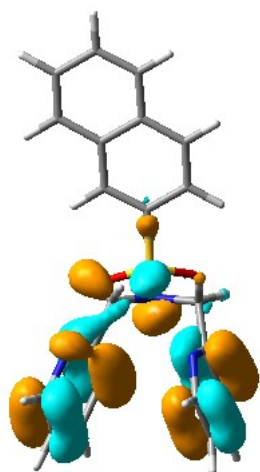

**HOTO**

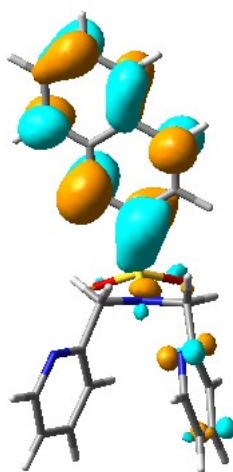

**LUTO**

Excited state symmetry could not be determined.

Excited State 6: Singlet-?Sym 5.1089 eV 242.68 nm f=0.2962 <S\*\*2>=0.000

|           |          |
|-----------|----------|
| 96 ->103  | 0.12567  |
| 97 ->103  | 0.11427  |
| 98 ->104  | 0.12184  |
| 98 ->105  | 0.17995  |
| 98 ->106  | 0.12539  |
| 99 ->103  | -0.10048 |
| 100 ->103 | 0.49784  |
| 101 ->103 | 0.11447  |
| 102 ->104 | 0.25705  |

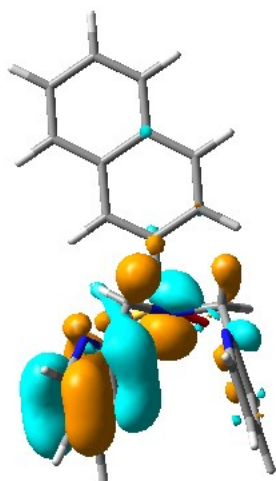

**HOTO**

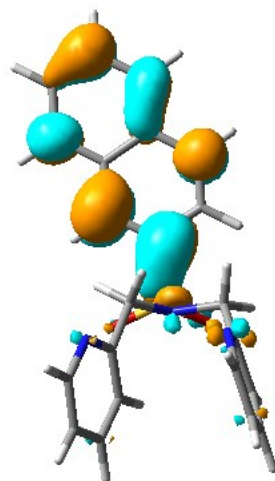

**LUTO**

Excited state symmetry could not be determined.

Excited State 7: Singlet-?Sym 5.2126 eV 237.86 nm f=0.0031 <S\*\*2>=0.000

|           |          |
|-----------|----------|
| 98 ->103  | -0.13284 |
| 99 ->103  | 0.18435  |
| 100 ->103 | -0.14726 |
| 102 ->104 | 0.34330  |
| 102 ->105 | 0.50265  |

Excited state symmetry could not be determined.

Excited State 8: Singlet-?Sym 5.2607 eV 235.68 nm f=0.0044 <S\*\*2>=0.000

|           |          |
|-----------|----------|
| 98 ->104  | -0.10312 |
| 98 ->105  | 0.11165  |
| 98 ->106  | 0.35890  |
| 98 ->107  | 0.37067  |
| 98 ->108  | -0.17284 |
| 99 ->103  | 0.13565  |
| 100 ->105 | 0.12211  |
| 100 ->107 | 0.10377  |
| 101 ->104 | -0.10232 |
| 101 ->106 | 0.12306  |
| 101 ->107 | 0.11776  |
| 102 ->106 | -0.16523 |
| 102 ->107 | -0.13352 |



Excited state symmetry could not be determined.

Excited State 9: Singlet-?Sym 5.3032 eV 233.79 nm f=0.0306 <S\*\*2>=0.000

|           |          |
|-----------|----------|
| 95 ->106  | -0.10350 |
| 100 ->103 | 0.15625  |
| 100 ->104 | 0.37669  |
| 100 ->105 | 0.32562  |
| 100 ->106 | -0.11139 |
| 101 ->104 | -0.21416 |
| 101 ->105 | -0.22494 |
| 102 ->106 | 0.11737  |

Excited state symmetry could not be determined.

Excited State 10: Singlet-?Sym 5.3772 eV 230.58 nm f=0.1415 <S\*\*2>=0.000

|           |          |
|-----------|----------|
| 98 ->106  | 0.17101  |
| 98 ->107  | 0.16086  |
| 99 ->103  | -0.30685 |
| 99 ->105  | 0.10291  |
| 99 ->106  | 0.14851  |
| 99 ->107  | 0.11380  |
| 99 ->108  | 0.23771  |
| 101 ->104 | 0.13725  |
| 101 ->108 | -0.12633 |
| 102 ->105 | 0.22599  |
| 102 ->106 | 0.31474  |

Excited state symmetry could not be determined.

Excited State 11: Singlet-?Sym 5.4255 eV 228.52 nm f=0.1441 <S\*\*2>=0.000

|          |         |
|----------|---------|
| 97 ->103 | 0.11312 |
| 98 ->103 | 0.10344 |
| 99 ->103 | 0.41816 |
| 99 ->105 | 0.10043 |
| 99 ->106 | 0.13598 |

|           |          |
|-----------|----------|
| 99 ->107  | 0.17871  |
| 99 ->108  | 0.25353  |
| 100 ->104 | -0.11156 |
| 100 ->107 | -0.10820 |
| 101 ->106 | -0.15049 |
| 101 ->108 | -0.11848 |
| 102 ->105 | -0.12361 |
| 102 ->107 | 0.15587  |

Excited state symmetry could not be determined.

Excited State 12: Singlet-?Sym 5.4390 eV 227.95 nm f=0.0082 <S\*\*2>=0.000

|           |          |
|-----------|----------|
| 99 ->103  | 0.20135  |
| 99 ->106  | -0.16286 |
| 99 ->108  | -0.22272 |
| 102 ->106 | 0.52072  |
| 102 ->107 | -0.12024 |

Excited state symmetry could not be determined.

Excited State 13: Singlet-?Sym 5.4691 eV 226.70 nm f=0.0469 <S\*\*2>=0.000

|           |          |
|-----------|----------|
| 98 ->103  | 0.46091  |
| 100 ->104 | 0.16426  |
| 101 ->104 | 0.17124  |
| 101 ->107 | -0.10530 |
| 102 ->105 | 0.13361  |
| 102 ->107 | 0.35507  |

Excited state symmetry could not be determined.

Excited State 14: Singlet-?Sym 5.4963 eV 225.58 nm f=0.0258 <S\*\*2>=0.000

|           |          |
|-----------|----------|
| 97 ->105  | -0.10049 |
| 98 ->103  | -0.20123 |
| 99 ->103  | -0.16593 |
| 99 ->108  | -0.12099 |
| 100 ->106 | 0.19496  |

100 ->107 -0.10315  
101 ->104 -0.16319  
102 ->107 0.46401

Excited state symmetry could not be determined.

Excited State 15: Singlet-?Sym 5.5432 eV 223.67 nm f=0.1390 <S\*\*2>=0.000

94 ->107 0.12480  
95 ->108 0.13849  
97 ->104 -0.11111  
97 ->105 -0.13658  
98 ->103 0.21419  
99 ->103 -0.12563  
100 ->106 0.34110  
100 ->107 -0.10003  
101 ->104 0.19453  
101 ->105 -0.19620  
101 ->106 -0.15902  
102 ->107 -0.22615

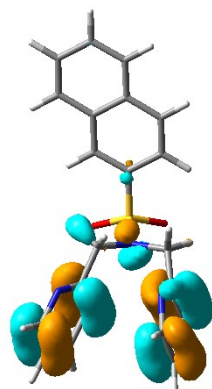

HOMO

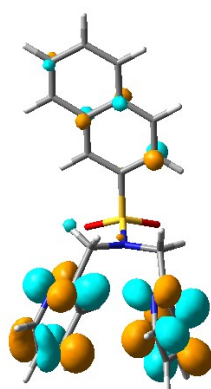

LUMO

Excited state symmetry could not be determined.

Excited State 16: Singlet-?Sym 5.5691 eV 222.63 nm f=0.0291 <S\*\*2>=0.000

97 ->103 0.51715  
98 ->103 -0.25483  
98 ->107 0.12523

101 ->104 0.28321

Excited state symmetry could not be determined.

Excited State 17: Singlet-?Sym 5.6325 eV 220.12 nm f=0.3422 <S\*\*2>=0.000

97 ->103 0.26505  
98 ->103 0.15067  
98 ->107 -0.10013  
99 ->106 0.10228  
99 ->107 -0.10401  
100 ->104 -0.12267  
100 ->105 -0.25727  
100 ->106 -0.17153  
100 ->107 0.14791  
101 ->104 -0.25454  
101 ->105 -0.20783  
101 ->106 0.10792  
102 ->104 -0.17950  
102 ->106 -0.12352

Excited state symmetry could not be determined.

Excited State 18: Singlet-?Sym 5.7063 eV 217.28 nm f=0.1358 <S\*\*2>=0.000

96 ->103 -0.18879  
96 ->105 0.11145  
97 ->103 0.24773  
100 ->105 0.11517  
100 ->107 -0.11027  
101 ->104 -0.22353  
101 ->105 0.46062  
102 ->105 0.12804

Excited state symmetry could not be determined.

Excited State 19: Singlet-?Sym 5.7256 eV 216.54 nm f=0.0154 <S\*\*2>=0.000

100 ->104 -0.36421

100 ->105 0.32171  
100 ->107 0.40300  
101 ->107 -0.23555

Excited state symmetry could not be determined.

Excited State 20: Singlet-?Sym 5.7737 eV 214.74 nm f=0.1385 <S\*\*2>=0.000

93 ->103 -0.23409  
96 ->103 0.39177  
97 ->104 0.14998  
99 ->105 0.10048  
101 ->106 -0.13230  
102 ->108 -0.13241  
102 ->109 0.38003

Excited state symmetry could not be determined.

Excited State 21: Singlet-?Sym 5.7927 eV 214.03 nm f=0.0061 <S\*\*2>=0.000

96 ->103 0.22175  
97 ->106 0.10403  
99 ->104 -0.23466  
99 ->105 -0.12896  
100 ->106 0.17102  
101 ->106 0.41577  
101 ->107 -0.24871  
102 ->106 0.10264  
102 ->107 -0.10198

Excited state symmetry could not be determined.

Excited State 22: Singlet-?Sym 5.8145 eV 213.23 nm f=0.0210 <S\*\*2>=0.000

93 ->103 0.12667  
97 ->103 0.10945  
97 ->104 0.20418  
97 ->105 0.25967  
97 ->106 0.11386

|           |          |
|-----------|----------|
| 99 ->105  | 0.10717  |
| 99 ->106  | 0.11966  |
| 99 ->107  | -0.11588 |
| 100 ->105 | 0.20934  |
| 100 ->106 | 0.16295  |
| 101 ->106 | 0.17584  |
| 101 ->107 | 0.21508  |
| 102 ->108 | 0.18885  |
| 102 ->109 | -0.16894 |

Excited state symmetry could not be determined.

Excited State 23: Singlet-?Sym 5.8324 eV 212.58 nm f=0.0160 <S\*\*2>=0.000

|           |          |
|-----------|----------|
| 93 ->103  | 0.10303  |
| 96 ->103  | 0.12172  |
| 100 ->104 | 0.24820  |
| 100 ->105 | -0.24250 |
| 100 ->106 | 0.30841  |
| 100 ->107 | 0.35195  |
| 101 ->104 | -0.11678 |
| 101 ->105 | 0.12471  |
| 101 ->106 | -0.14329 |
| 101 ->107 | -0.10376 |
| 102 ->108 | 0.18408  |
| 102 ->109 | -0.11908 |

Excited state symmetry could not be determined.

Excited State 24: Singlet-?Sym 5.8608 eV 211.55 nm f=0.0223 <S\*\*2>=0.000

|          |          |
|----------|----------|
| 96 ->103 | 0.19093  |
| 97 ->104 | -0.17662 |
| 97 ->105 | -0.16147 |
| 97 ->107 | 0.10984  |
| 98 ->106 | -0.14097 |
| 99 ->108 | 0.12392  |

|           |          |
|-----------|----------|
| 100 ->106 | -0.12193 |
| 100 ->107 | 0.10901  |
| 101 ->105 | 0.13757  |
| 101 ->106 | 0.14126  |
| 101 ->107 | 0.30626  |
| 101 ->108 | -0.10301 |
| 102 ->108 | 0.27833  |

Excited state symmetry could not be determined.

Excited State 25: Singlet-?Sym 5.8898 eV 210.51 nm f=0.1247 <S\*\*2>=0.000

|           |          |
|-----------|----------|
| 96 ->103  | 0.22552  |
| 99 ->105  | -0.10836 |
| 99 ->108  | -0.10793 |
| 100 ->104 | -0.10129 |
| 100 ->106 | -0.17044 |
| 100 ->107 | -0.21447 |
| 101 ->106 | -0.19519 |
| 101 ->107 | -0.25541 |
| 102 ->108 | 0.35906  |

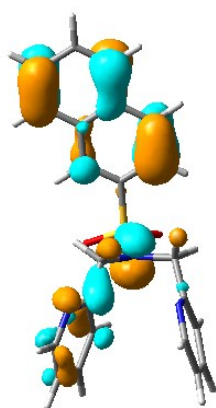

HOMO

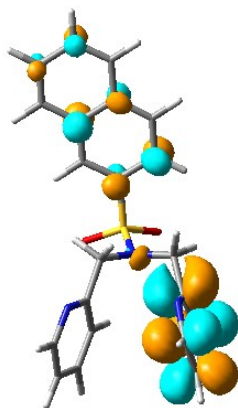

LUMO

Excited state symmetry could not be determined.

Excited State 26: Singlet-?Sym 5.9254 eV 209.24 nm f=0.0849 <S\*\*2>=0.000

|          |          |
|----------|----------|
| 93 ->103 | -0.24565 |
| 96 ->103 | -0.27757 |

|           |          |
|-----------|----------|
| 97 ->104  | 0.10287  |
| 98 ->104  | 0.10845  |
| 99 ->104  | -0.15420 |
| 102 ->108 | 0.38867  |
| 102 ->109 | 0.29626  |

Excited state symmetry could not be determined.

Excited State 27: Singlet-?Sym 5.9708 eV 207.65 nm f=0.0906 <S\*\*2>=0.000

|           |          |
|-----------|----------|
| 93 ->103  | -0.12878 |
| 97 ->104  | -0.14813 |
| 98 ->104  | -0.31343 |
| 98 ->106  | 0.22397  |
| 98 ->107  | -0.28428 |
| 99 ->104  | 0.31667  |
| 99 ->106  | 0.11622  |
| 99 ->107  | -0.12309 |
| 101 ->104 | 0.11537  |
| 102 ->108 | 0.10084  |
| 102 ->109 | 0.13354  |

Excited state symmetry could not be determined.

Excited State 28: Singlet-?Sym 5.9857 eV 207.14 nm f=0.0108 <S\*\*2>=0.000

|           |          |
|-----------|----------|
| 97 ->104  | 0.27469  |
| 97 ->106  | -0.26678 |
| 97 ->107  | 0.19965  |
| 98 ->104  | -0.16654 |
| 98 ->106  | 0.17415  |
| 98 ->107  | -0.21082 |
| 99 ->104  | -0.18311 |
| 99 ->105  | -0.10650 |
| 99 ->106  | -0.22837 |
| 99 ->107  | 0.19096  |
| 101 ->107 | 0.12036  |



Excited state symmetry could not be determined.

Excited State 29: Singlet-?Sym 6.0560 eV 204.73 nm f=0.0728 <S\*\*2>=0.000

|           |          |
|-----------|----------|
| 96 ->104  | 0.16803  |
| 97 ->105  | -0.10400 |
| 98 ->106  | 0.12610  |
| 99 ->104  | -0.27945 |
| 99 ->105  | 0.50735  |
| 99 ->108  | -0.14096 |
| 101 ->105 | 0.10374  |
| 101 ->108 | 0.11374  |

Excited state symmetry could not be determined.

Excited State 30: Singlet-?Sym 6.0776 eV 204.00 nm f=0.0062 <S\*\*2>=0.000

|          |         |
|----------|---------|
| 95 ->103 | 0.66679 |
|----------|---------|

### [PtCl<sub>2</sub>(N(SO<sub>2</sub>(2-nap))dpa)] system

Excitation energies and oscillator strengths:

Excited state symmetry could not be determined.

Excited State 1: Singlet-?Sym 3.6564 eV 339.08 nm f=0.0002 <S\*\*2>=0.000

|            |          |
|------------|----------|
| 126 -> 133 | 0.64213  |
| 126 -> 134 | 0.14491  |
| 127 -> 133 | -0.17437 |
| 128 -> 133 | 0.13091  |

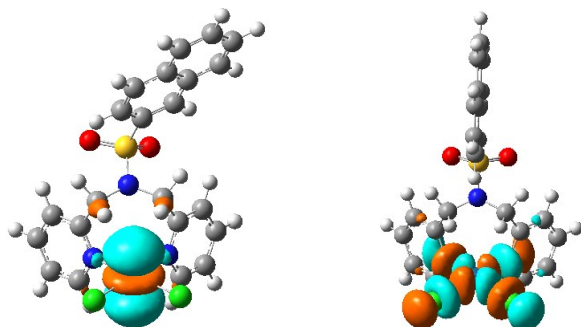

**HOTO****LUTO**

Excited State 2: Singlet-?Sym 3.7971 eV 326.52 nm f=0.0007 <S\*\*2>=0.000

124 -> 133 0.15356

125 -> 133 0.64762

125 -> 134 0.14541

Excited State 3: Singlet-?Sym 3.8400 eV 322.87 nm f=0.0003 <S\*\*2>=0.000

115 -> 133 0.12577

126 -> 133 0.16908

127 -> 133 0.64223

127 -> 134 0.14403

Excited state symmetry could not be determined.

Excited State 4: Singlet-?Sym 3.9452 eV 314.26 nm f=0.0006 <S\*\*2>=0.000

114 -> 133 -0.11033

124 -> 133 0.60912

124 -> 134 0.13579

125 -> 133 -0.13554

127 -> 129 -0.16861

127 -> 130 0.14689

Excited State 5: Singlet-?Sym 3.9979 eV 310.12 nm f=0.0003 <S\*\*2>=0.000

126 -> 129 0.49463

126 -> 130 -0.43537

127 -> 129 -0.13272

127 -> 130 0.11942

128 -> 129 0.12138

128 -> 130 -0.10163

Excited State 6: Singlet-?Sym 4.1498 eV 298.77 nm f=0.0002 <S\*\*2>=0.000

|            |          |
|------------|----------|
| 126 -> 129 | 0.14560  |
| 126 -> 130 | 0.11171  |
| 126 -> 131 | 0.54325  |
| 127 -> 129 | 0.22058  |
| 127 -> 130 | -0.25888 |
| 127 -> 131 | -0.11840 |
| 128 -> 131 | 0.13382  |

Excited State 7: Singlet-?Sym 4.1561 eV 298.32 nm f=0.0004 <S\*\*2>=0.000

|            |          |
|------------|----------|
| 124 -> 133 | 0.18358  |
| 126 -> 130 | -0.19505 |
| 126 -> 131 | -0.30113 |
| 127 -> 129 | 0.42928  |
| 127 -> 130 | -0.32986 |
| 127 -> 131 | 0.13647  |

Excited State 8: Singlet-?Sym 4.2545 eV 291.42 nm f=0.0094 <S\*\*2>=0.000

|            |          |
|------------|----------|
| 124 -> 129 | 0.39745  |
| 124 -> 130 | -0.36024 |
| 125 -> 129 | -0.14635 |
| 125 -> 130 | 0.13510  |
| 127 -> 131 | -0.30099 |
| 128 -> 129 | -0.20146 |

Excited State 9: Singlet-?Sym 4.2665 eV 290.60 nm f=0.0472 <S\*\*2>=0.000

|            |         |
|------------|---------|
| 123 -> 129 | 0.11884 |
| 123 -> 130 | 0.12685 |
| 123 -> 132 | 0.11165 |

124 -> 129 0.12759  
 127 -> 131 -0.12942  
 128 -> 129 0.44555  
 128 -> 130 0.36584  
 128 -> 131 -0.11746  
 128 -> 134 0.15196

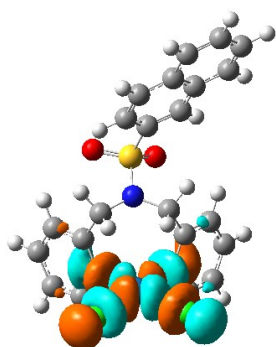

**HOTO**

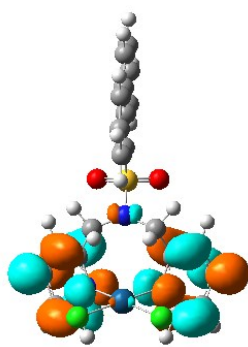

**LUTO**

Excited State 10: Singlet-?Sym 4.2821 eV 289.54 nm f=0.0005 <S\*\*2>=0.000

124 -> 129 0.27186  
 124 -> 130 -0.22822  
 126 -> 131 0.14721  
 127 -> 130 0.18073  
 127 -> 131 0.54097

Excited State 11: Singlet-?Sym 4.3982 eV 281.89 nm f=0.0139 <S\*\*2>=0.000

124 -> 130 0.17764  
 124 -> 131 0.50464  
 125 -> 129 -0.11139  
 125 -> 131 -0.39154  
 128 -> 131 -0.12723

Excited State 12: Singlet-?Sym 4.4081 eV 281.27 nm f=0.0562 <S\*\*2>=0.000

124 -> 129 0.17263

124 -> 130 -0.10635

125 -> 129 0.49304

125 -> 130 -0.43023

Excited State 13: Singlet-?Sym 4.4514 eV 278.53 nm f=0.0536 <S\*\*2>=0.000

124 -> 130 0.12096

124 -> 131 0.40352

125 -> 130 0.16800

125 -> 131 0.51053

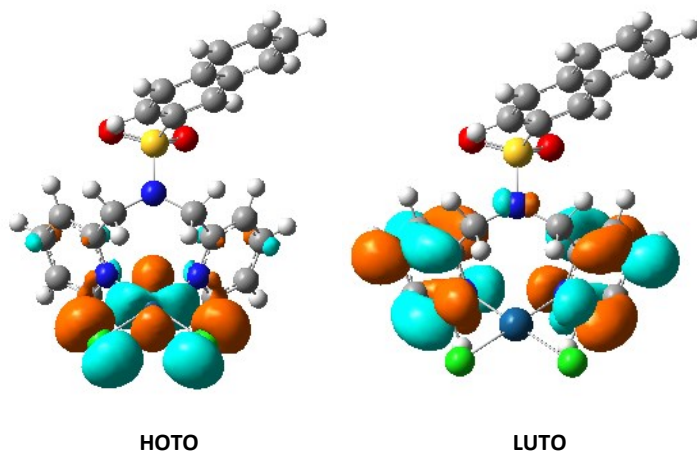

Excited State 14: Singlet-?Sym 4.4760 eV 277.00 nm f=0.0291 <S\*\*2>=0.000

123 -> 129 0.32742

123 -> 130 0.24047

128 -> 129 -0.26463

128 -> 130 -0.10373

128 -> 132 -0.28380

128 -> 134 0.31203

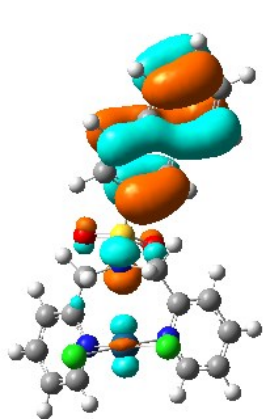

HOTO

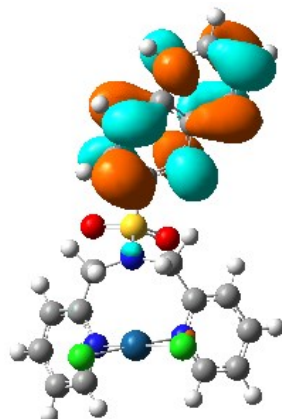

LUTO

Excited State 15: Singlet-?Sym 4.5467 eV 272.69 nm f=0.0021 <S\*\*2>=0.000

126 -> 129 0.14316

128 -> 129 -0.34901

128 -> 130 0.55483

Excited State 16: Singlet-?Sym 4.5806 eV 270.68 nm f=0.0028 <S\*\*2>=0.000

126 -> 129 0.35480

126 -> 130 0.39542

126 -> 131 -0.17077

126 -> 132 -0.28295

126 -> 134 -0.16242

127 -> 129 -0.10737

127 -> 130 -0.11712

128 -> 132 -0.14148

Excited State 17: Singlet-?Sym 4.6428 eV 267.05 nm f=0.0001 <S\*\*2>=0.000

126 -> 129 0.11558

126 -> 130 0.12562

127 -> 129 0.40305

127 -> 130 0.43365

127 -> 131 -0.20934  
127 -> 132 -0.22334  
127 -> 134 -0.10870

Excited State 18: Singlet-?Sym 4.6563 eV 266.27 nm f=0.0025 <S\*\*2>=0.000

123 -> 131 -0.10342  
126 -> 131 -0.15117  
128 -> 129 0.16085  
128 -> 131 0.64099

Excited State 19: Singlet-?Sym 4.7503 eV 261.00 nm f=0.0123 <S\*\*2>=0.000

125 -> 129 0.39151  
125 -> 130 0.43218  
125 -> 131 -0.21108  
125 -> 132 -0.25900  
125 -> 134 -0.13206

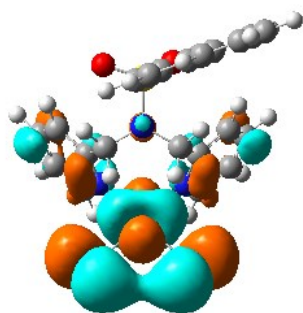

HOTO

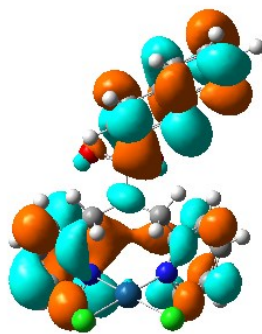

LUTO

Excited State 20: Singlet-?Sym 4.7970 eV 258.46 nm f=0.0067 <S\*\*2>=0.000

124 -> 129 -0.24169  
124 -> 130 -0.24892  
124 -> 131 0.12264  
124 -> 132 0.15029

|            |          |
|------------|----------|
| 126 -> 129 | 0.17427  |
| 126 -> 130 | 0.18947  |
| 126 -> 132 | 0.38417  |
| 126 -> 134 | 0.23626  |
| 127 -> 132 | -0.12200 |
| 128 -> 134 | 0.10105  |



7. IC<sub>50</sub> graphs of compounds against MCF-7 human breast cancer cells

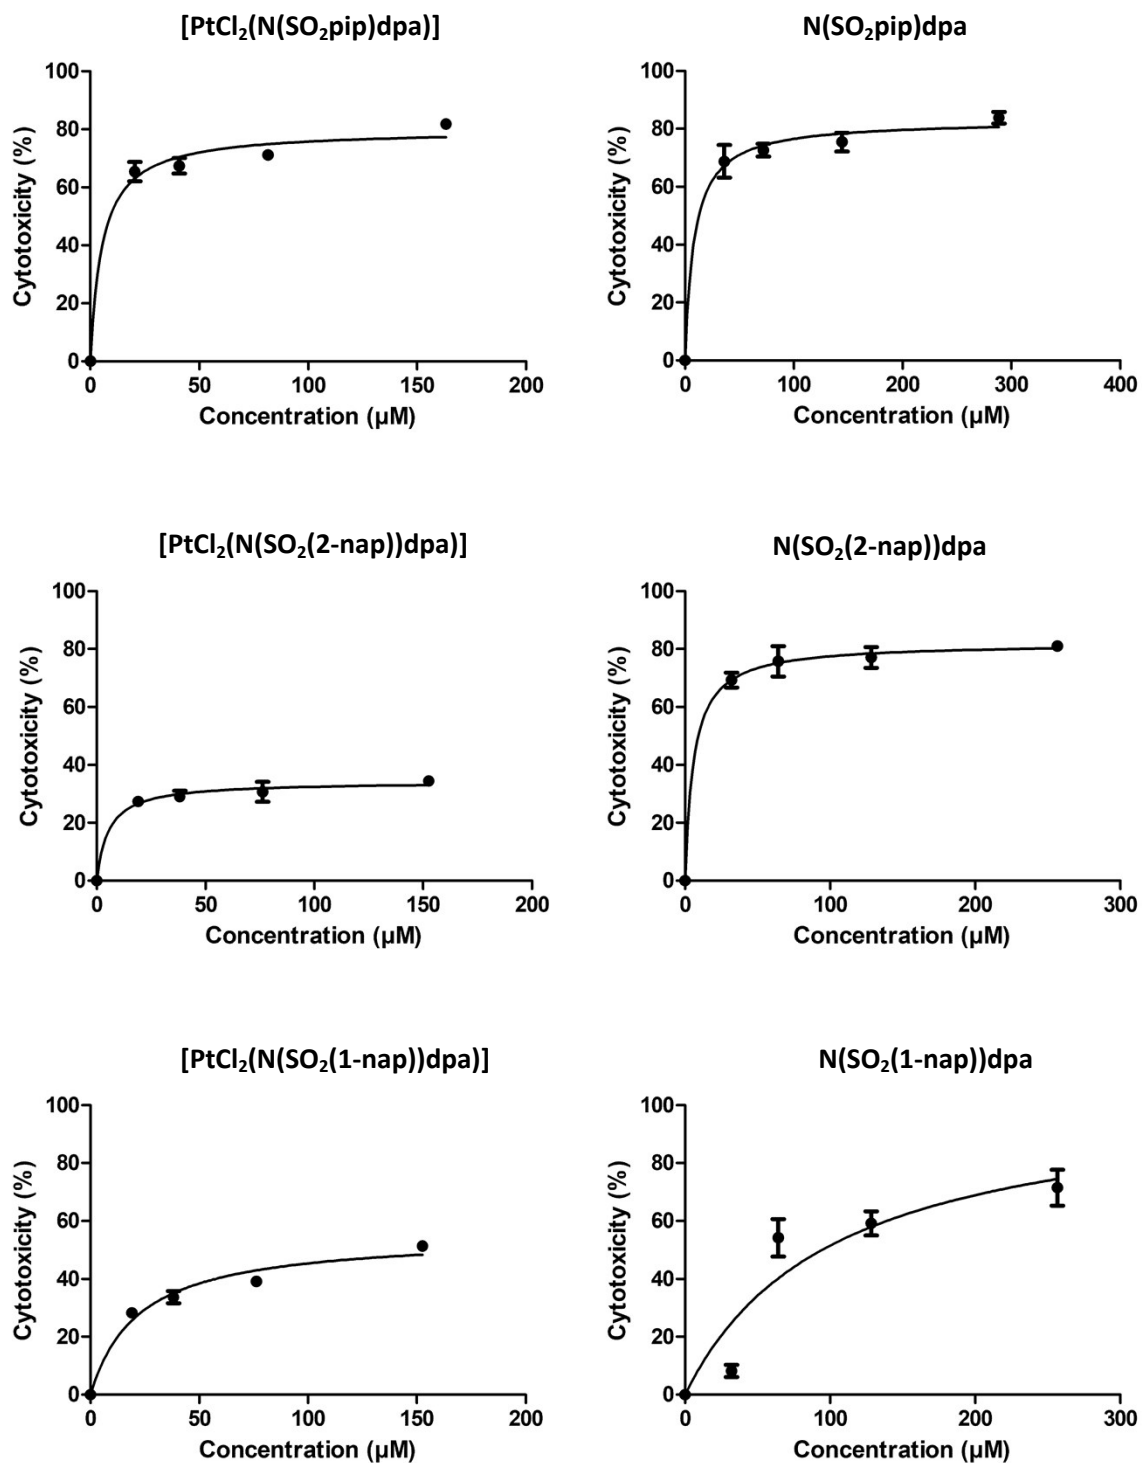

Fig S3. IC<sub>50</sub> graphs of compounds

8. IC<sub>50</sub> graphs of compounds against MCF-10A human normal breast cells

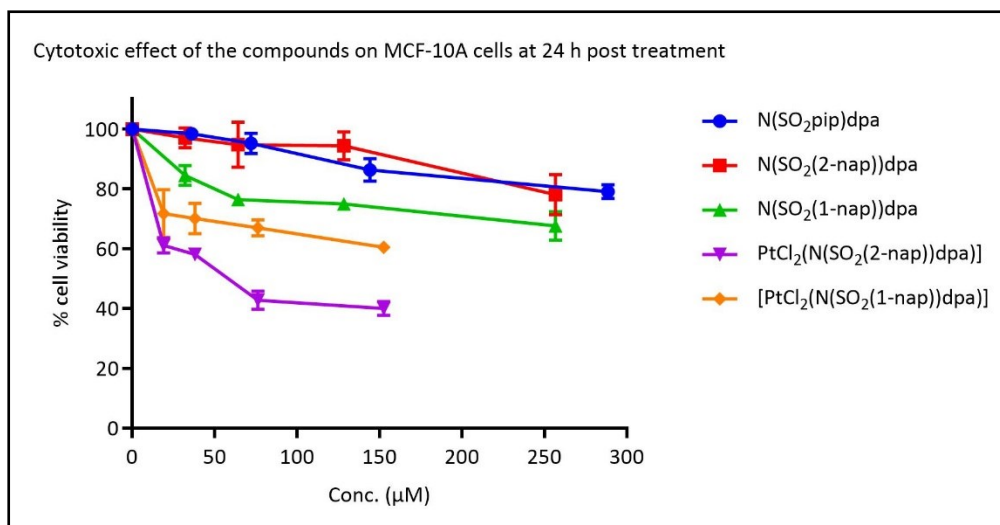

9. Cartesian coordinates of the optimized structures

**N(SO<sub>2</sub>(2-nap))dpa system**

S 4.54194000 1.71050500 5.13762800  
O 4.32082900 0.56066200 4.30771000  
O 4.90949300 1.54382500 6.51548200  
N 0.69181200 4.46903600 5.99196600  
N 3.15920000 2.57659000 5.11818000  
N 0.34574800 2.62471000 2.79941700  
C -0.59183600 4.43864300 6.34261600  
H -1.24542700 5.14048900 5.83295800  
C -1.10193600 3.57542200 7.29848900  
H -2.15677600 3.59211600 7.54214400  
C -0.22820400 2.70485700 7.93206200  
H -0.58339500 2.01913000 8.69227500  
C 1.10677100 2.72582100 7.57164600  
H 1.82254000 2.05441900 8.03112600  
C 1.52200500 3.61810000 6.59007800  
C 2.95041100 3.62256900 6.11817900  
H 3.18378400 4.60332400 5.69244000  
H 3.61816700 3.42393200 6.95401800  
C 2.49848100 2.76481600 3.83682400  
H 3.13092400 2.36542300 3.04002100  
H 2.38351800 3.83412600 3.64323000  
C 1.14212800 2.11447700 3.73642900  
C 0.76705200 1.04810000 4.54143600  
H 1.45152900 0.66617800 5.28667100  
C -0.49481200 0.50333700 4.37601200  
H -0.81973600 -0.32374000 4.99663700  
C -1.33270600 1.03290800 3.40764300  
H -2.32908000 0.64142300 3.24567400  
C -0.86065300 2.08788800 2.64292700  
H -1.48554100 2.52789900 1.87082600  
C 5.76352000 2.70958400 4.36189600  
C 6.09688200 2.47660400 3.05487300

H 5.65573500 1.64523200 2.51849200  
C 7.02985500 3.31268600 2.40589000  
C 7.40190700 3.10396100 1.05952900  
H 6.95702400 2.27801800 0.51567500  
C 8.30697200 3.93215700 0.45400600  
H 8.58714200 3.76743300 -0.57968800  
C 8.88020800 5.00292000 1.16800700  
H 9.59602500 5.65052000 0.67537700  
C 8.53990500 5.22824100 2.47463300  
H 8.98137900 6.05125300 3.02572100  
C 7.60835500 4.39304400 3.12763600  
C 7.23834800 4.59511500 4.47784400  
H 7.68966400 5.41361100 5.02732800  
C 6.33561900 3.77527600 5.09060500  
H 6.06891200 3.92487300 6.12897000

**[PtCl<sub>2</sub>(N(SO<sub>2</sub>(1-nap))dpa)] complex**

Pt 6.77147200 4.57946800 10.39376400  
Cl 5.91861200 5.12465400 8.30810400  
Cl 4.80423500 5.18225800 11.46251500  
N 8.49844600 3.99009300 9.49741000  
N 9.76957300 6.22642300 11.41342700  
N 7.54559500 4.05072000 12.19891600  
C 8.53625600 2.75082100 8.99031600  
H 7.63113200 2.16859900 9.09301700  
C 9.65596800 2.24459000 8.36582200  
H 9.63497400 1.23785700 7.97114600  
C 10.77696400 3.04913500 8.25580200  
H 11.67319500 2.68806800 7.76689500  
C 10.73146200 4.32736900 8.78100300  
H 11.58632200 4.98716300 8.72675300  
C 9.57991600 4.78048300 9.40374100  
C 9.51633000 6.16874100 9.97562600  
H 10.25512100 6.78346900 9.46310100  
H 8.53123900 6.59914300 9.78379800  
C 8.66819300 6.22272400 12.37338400  
H 7.78674200 6.64104200 11.88350400  
H 8.92641400 6.87230800 13.20882700  
C 8.33975200 4.86091100 12.91736700  
C 8.83618600 4.45310500 14.14473900  
H 9.47677000 5.12764000 14.69579600  
C 8.52131300 3.19984200 14.63661400  
H 8.90494300 2.87400000 15.59541700  
C 7.70628700 2.37443900 13.88138400  
H 7.42564700 1.38581900 14.21854300  
C 7.23633000 2.83565800 12.67037400  
H 6.58737500 2.23500800 12.04824400  
S 11.25819000 6.61825500 11.93274100  
O 12.19343500 6.13224200 10.95704600  
O 11.36715200 6.17313000 13.29392600  
C 11.34540600 8.38519100 11.93280400  
C 10.26047500 9.11469600 11.52640500  
H 9.35253500 8.62068700 11.20771300  
C 10.30933300 10.51960300 11.51756300  
H 9.44057700 11.07819600 11.19276800  
C 11.44466900 11.16413600 11.91630500  
H 11.49209700 12.24743000 11.91303200  
C 12.58162700 10.44069000 12.34134500  
C 13.75462700 11.11029500 12.75337600  
H 13.76383800 12.19450100 12.73706200  
C 14.85399500 10.40893900 13.16382900

H 15.74959800 10.93134500 13.47829200  
C 14.82317000 9.00304900 13.17825700  
H 15.69694200 8.45122600 13.50419300  
C 13.70232600 8.32195300 12.78562900  
H 13.70439300 7.24055100 12.80652200  
C 12.54985100 9.01728100 12.35638100

**[PtCl<sub>2</sub>(N(SO<sub>2</sub>(2-nap)dpa))] complex**

Pt 18.24248900 4.86333400 7.73597600  
Cl 18.93409100 5.44651700 9.86989100  
Cl 20.29192600 5.43770700 6.81395300  
S 13.87607400 6.71030300 5.77574300  
N 16.45112000 4.30614700 8.51993000  
N 15.33831800 6.44948200 6.45380900  
N 17.62128700 4.29729600 5.88310800  
C 16.36450400 3.08196900 9.05606700  
H 17.26435100 2.48338700 9.02138800  
C 15.20270900 2.60989300 9.62862600  
H 15.18424900 1.61389500 10.04976800  
C 14.09103900 3.43443000 9.65413200  
H 13.16301100 3.10020900 10.10107200  
C 14.18685700 4.69658800 9.09741700  
H 13.34109300 5.37040100 9.08331800  
C 15.37920800 5.11476700 8.52943000  
C 15.49364100 6.47590800 7.90263300  
H 14.72851100 7.11825200 8.33415400  
H 16.47059200 6.90512900 8.13067500  
C 16.49590500 6.45197300 5.56891200  
H 17.32998000 6.91274200 6.10100800  
H 16.27725200 7.08230900 4.70426000  
C 16.90019500 5.09172800 5.07545500  
C 16.54522200 4.66687700 3.80562700  
H 15.96661100 5.32943900 3.17686900  
C 16.91890500 3.41083400 3.36508700  
H 16.64480900 3.07235000 2.37365000  
C 17.64853300 2.59838600 4.21556500  
H 17.96773300 1.60704000 3.92382000  
C 17.98421100 3.07821100 5.46340100  
H 18.56822000 2.49118500 6.15847600  
O 12.91977200 6.64967100 6.84495600  
O 13.74534400 5.83883600 4.64364500  
C 13.93973800 8.35719100 5.16702200  
C 14.02165300 8.57699000 3.81920800  
H 14.01938300 7.74162100 3.12978900  
C 14.09813300 9.89655900 3.32460900  
C 14.18004200 10.16545000 1.94105000  
H 14.18457800 9.33378300 1.24523200  
C 14.25184200 11.45502200 1.48916100  
H 14.31426000 11.65552600 0.42616700  
C 14.24453300 12.52888500 2.40045300  
H 14.30139300 13.54501000 2.02809900  
C 14.16591000 12.29769400 3.74776700  
H 14.15950700 13.12413500 4.44971500  
C 14.09111700 10.97983800 4.24567300  
C 14.00550400 10.70571900 5.63176500  
H 13.99478100 11.53539700 6.32955200  
C 13.93120600 9.42404300 6.09213200  
H 13.85346700 9.22235700 7.15293300

**[PtCl<sub>2</sub>(N(SO<sub>2</sub>pip)dpa))] complex**

Pt 4.93334600 4.69948400 6.25613400  
Cl 2.81452500 4.13415200 5.50621400  
Cl 5.90023400 4.20958000 4.20640600  
S 6.76864300 2.39638100 10.55346700  
O 5.77724600 2.71379900 11.53687000  
O 8.09458600 2.92896100 10.64750100  
N 4.13273600 5.18897000 8.05827400  
N 6.16025400 2.91907900 9.12322700  
N 6.75641700 5.25164100 6.96782600  
N 6.92325500 0.77472200 10.55437400  
C 3.61057900 6.41546800 8.18840700  
H 3.63518200 7.03906000 7.30535700  
C 3.06462400 6.85997300 9.37344700  
H 2.65284000 7.85858800 9.42768000  
C 3.05398100 6.00525700 10.46261400  
H 2.62919000 6.31811600 11.40833700  
C 3.59248700 4.73981300 10.32019500  
H 3.61154800 4.04081700 11.14502500  
C 4.13239800 4.34814000 9.10540100  
C 4.71571100 2.97279500 8.93411300  
H 4.23626900 2.31364300 9.65459100  
H 4.48304700 2.60137800 7.93423400  
C 7.05922800 3.03589400 7.98116100  
H 6.55393600 2.64142000 7.09742700  
H 7.94060700 2.42254200 8.15779100  
C 7.52661300 4.43930600 7.70961800  
C 8.74248800 4.88325000 8.20522400  
H 9.33609600 4.20626200 8.80391300  
C 9.16901900 6.17182500 7.94302000  
H 10.11716500 6.52581400 8.32833500  
C 8.36300000 6.99602300 7.17648500  
H 8.64891900 8.01106600 6.93621700  
C 7.16646500 6.49978600 6.70564700  
H 6.50487600 7.09954500 6.09616500  
C 8.01702200 0.18000400 9.78182300  
H 8.88495300 0.83257100 9.85474500  
H 7.72881200 0.09566300 8.72411600  
C 8.33168200 -1.19911800 10.33055900  
H 8.71300500 -1.09448200 11.35136400  
H 9.12871600 -1.63992800 9.72671200  
C 7.09469700 -2.08252500 10.32600700  
H 7.31711900 -3.05464000 10.77220900  
H 6.78745400 -2.27022100 9.29022200  
C 5.95858600 -1.40308500 11.07288700  
H 5.03889500 -1.98895200 11.00191400  
H 6.21020000 -1.31581100 12.13468200  
C 5.69054600 -0.01545900 10.51993500  
H 5.32386700 -0.09096500 9.48604400  
H 4.93684600 0.49382000 11.11829100
